# Supplementary material for: The coupling of blue emitting carbon dots with Eu3+/Tb3+ co-doped luminescent glasses for utilization in white light emitting diodes
Source: Royal Society of Chemistry journal article supplement (doi:10.1039/d3cp00137g), 2023-01-01
Supplement: d3cp00137g1.pdf [file d3cp00137g1.pdf]

Supplementary Material

**The Coupling of Blue Emitting Carbon Dots with  $\text{Eu}^{3+}/\text{Tb}^{3+}$  Co-Doped Luminescent Glasses for Utilization in White-Light Emitting Diodes**

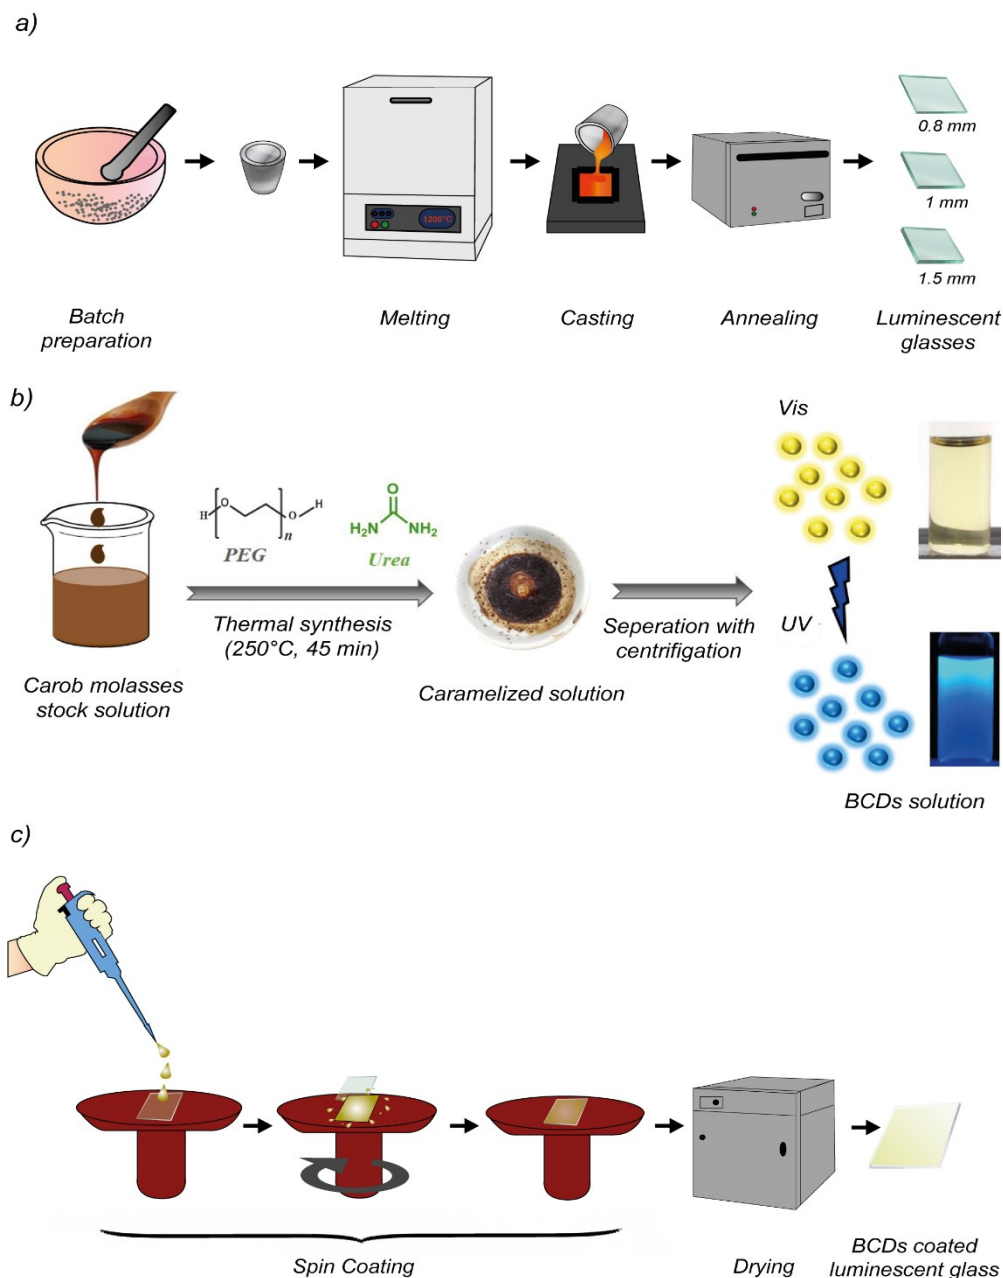

**Fig. S1** Schematic representation of (a) the manufacturing procedure for  $\text{Eu}^{3+}/\text{Tb}^{3+}$  co-doped luminescent glasses with different thickness values, (b) the synthesis of BCDs via hydrothermal route, and (c) the spin-coating of BCDs on luminescent glasses.

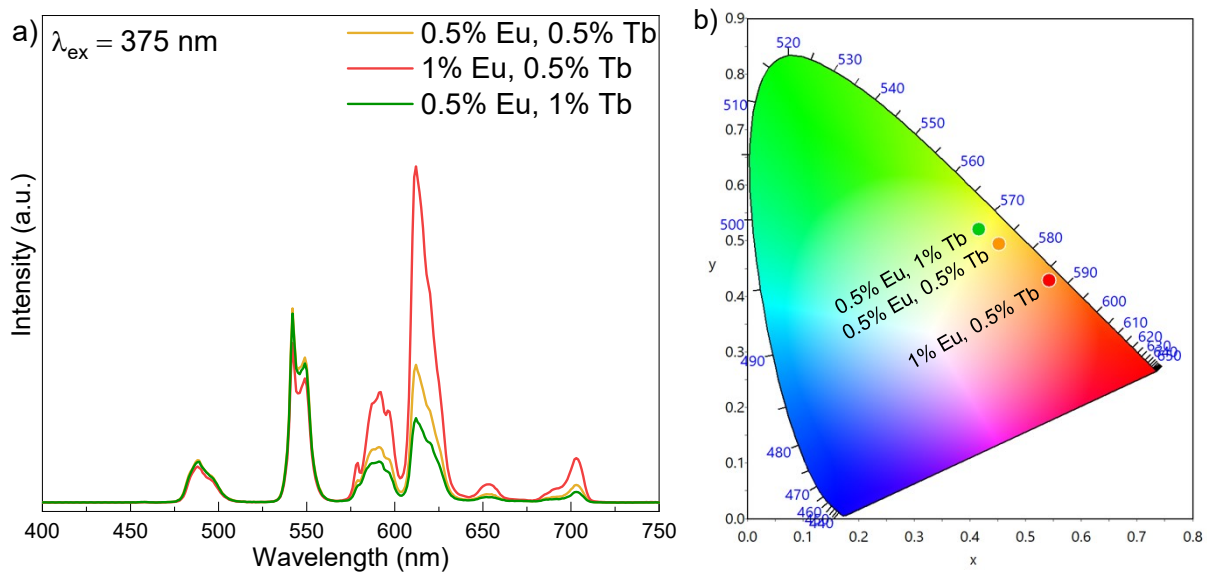

**Fig. S2** (a) Photoluminescence spectrum and (b) corresponding CIE chromaticity diagram for different amounts of  $\text{Eu}^{3+}/\text{Tb}^{3+}$  co-doped luminescent glasses under 375 nm excitation wavelength.

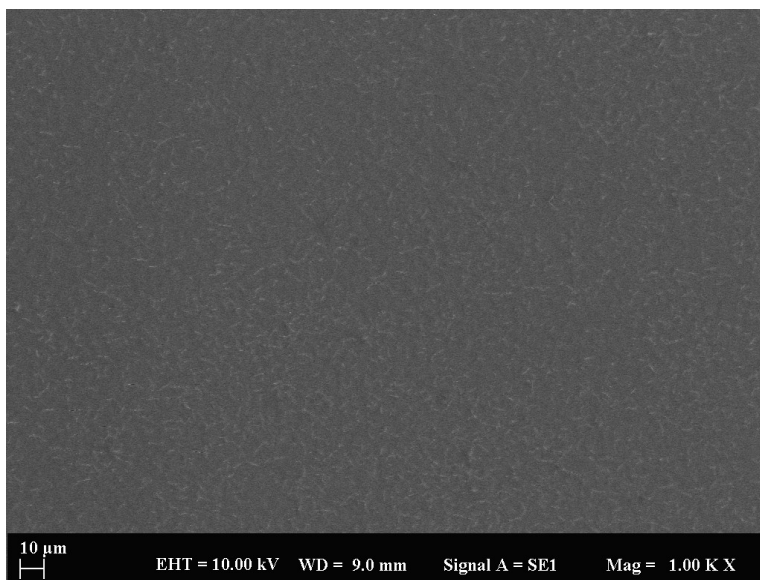

**Fig. S3** SEM image of a selected luminescent glass sample coated with BCD/PVP solution (LG1.5-7L) demonstrating the homogenous nature of coating layer.

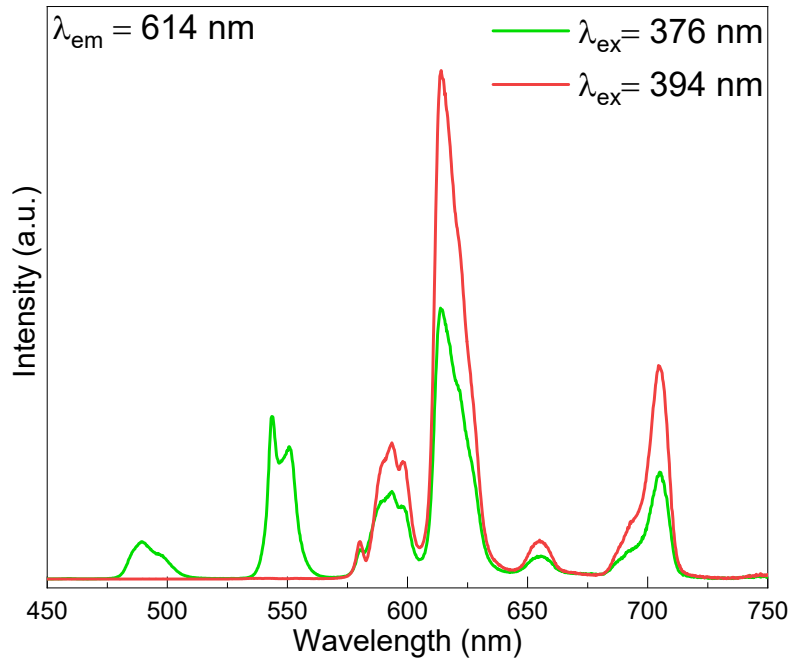

**Fig. S4** The overlapping spectra of selected LG0.8 luminescent glass sample recorded on hypersensitive excitation wavelengths for Tb<sup>3+</sup> (376 nm) and Eu<sup>3+</sup> (394 nm) by monitoring 614 nm emission proving the energy transfer from Tb<sup>3+</sup> to Eu<sup>3+</sup>.

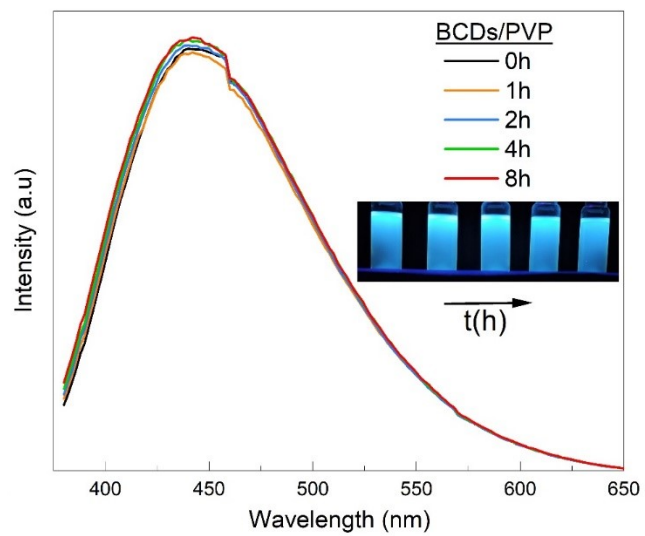

**Fig. S5** The PL emission spectra of BCD/PVP solution under 375 nm UV irradiation as a function of time (inset photograph displays the time-dependent photobleaching behavior).

**Table S1** Colorimetric properties for uncoated and BCD-coated glass samples under 375 nm excitation.

| <b>Sample Code</b> | <b>CIE Coordinates (x,y)</b> | <b>CCT (K)</b> | <b>CRI (Ra)</b> | <b>Purity (%)</b> |
|--------------------|------------------------------|----------------|-----------------|-------------------|
| LG0.8              | 0.5287, 0.4408               | 2152           | 86              | 91.1              |
| LG0.8-1L           | 0.3821, 0.3958               | 3628           | 88              | 44.3              |
| LG0.8-3L           | 0.3299, 0.3421               | 4684           | 92              | 15.2              |
| LG1                | 0.5291, 0.4438               | 2167           | 85              | 92.1              |
| LG1-1L             | 0.4283, 0.4498               | 3191           | 82              | 70                |
| LG1-3L             | 0.4062, 0.4376               | 3470           | 82              | 61.2              |
| LG1-5L             | 0.3480, 0.3563               | 4187           | 91              | 24.4              |
| LG1.5              | 0.5091, 0.4570               | 2440           | 83              | 90                |
| LG1.5-1L           | 0.4537, 0.4783               | 3264           | 75              | 79.8              |
| LG1.5-3L           | 0.4525, 0.4729               | 3247           | 76              | 77.9              |
| LG1.5-5L           | 0.4530, 0.4760               | 3260           | 75              | 78.9              |
| LG1.5-7L           | 0.4523, 0.4713               | 3240           | 77              | 77.3              |

**Table S2** Comparison of the CIE color coordinates, CCT, CRI, color purity, and PLQY values of optimal BCD-coated  $\text{Eu}^{3+}/\text{Tb}^{3+}$  co-doped luminescent glasses with some reported studies on  $\text{Eu}^{3+}/\text{Tb}^{3+}$  doped glasses and glass-ceramics for white light generation along with commercial WLEDs

| Sample Name                                                      | $\lambda_{\text{ex}}$<br>(nm) | CIE Coordinates<br>(x, y) | CCT<br>(K) | CRI<br>( $R_a$ ) | Purity<br>(%) | PLQY<br>(%) | Reference    |
|------------------------------------------------------------------|-------------------------------|---------------------------|------------|------------------|---------------|-------------|--------------|
| $\text{Eu}^{3+}/\text{Tb}^{3+}$ doped glass                      | 380                           | 0.325, 0.321              |            |                  |               |             | [24]         |
| $\text{Eu}^{3+}/\text{Tb}^{3+}$ doped glass                      | 385                           | 0.36, 0.35                |            |                  |               |             | [71]         |
| $\text{Eu}^{3+}/\text{Tb}^{3+}$ doped glass                      | 365                           | 0.3382, 0.2763            | 5010       |                  |               |             | [72]         |
| $\text{Eu}^{2+,3+}/\text{Tb}^{3+}$ doped glass                   | 380                           | 0.325, 0.321              |            |                  |               | 39.51       | [23]         |
| $\text{Eu}^{3+}/\text{Tb}^{3+}$ doped $\text{CsPbBr}_3$ QD glass | 450                           | 0.3335, 0.3413            | 4945       | 86               |               |             | [2]          |
| $\text{Ce}^{3+}/\text{Eu}^{3+}/\text{Tb}^{3+}$ doped glass       | 380                           | 0.329, 0.327              | 5661       |                  |               |             | [28]         |
| $\text{Ce}^{3+}/\text{Eu}^{3+}/\text{Tb}^{3+}$ doped glass       | 375                           | 0.333, 0.353              | 5502       |                  |               |             | [29]         |
| $\text{Tm}^{3+}/\text{Eu}^{3+}/\text{Tb}^{3+}$ doped glass       | 360                           | 0.336, 0.329              |            |                  |               |             | [30]         |
| CD Phosphors                                                     | 450                           | 0.34, 0.31                | 5048       | 82               |               | 30-40       | [73]         |
| Commercial WLED ( $\text{YAG}:\text{Ce}^{3+}$ )                  | 450                           | 0.33, 0.33                | >6000      | <70              |               |             | [74]         |
| LG0.8-3L                                                         | 375                           | 0.3299, 0.3421            | 4683       | 92               | 15.3          | 55.58       | Present Work |
| LG1-5L                                                           | 375                           | 0.3480, 0.3563            | 4186       | 91               | 24.4          | 48.22       | Present Work |
